# Supplementary material
Source: Springer Nature journal article supplement (https://www.springermedizin.de/resource/supplementary/12885_2013_4591_MOESM1_ESM.pdf/9466788)
Supplement: MOESM1 [file 9466788]

**MS: 9461341321163148**

**Recurrent differentiated thyroid cancer: towards personalized treatment based on evaluation of tumour characteristics with PET (THYROPET Study): study protocol of a multicentre observational cohort study**

## **List of participating centers**

1. Amsterdam Medical Center
2. Antonius Ziekenhuis
3. Catherina ziekenhuis
4. Erasmus MC
5. Groene Hart Ziekenhuis
6. Instituut Vebeeten
7. Isala Klinieken
8. Jeroen Bosch Ziekenhuis
9. Leiden University Medical Center
10. Meander Medisch Centrum
11. Medisch Centrum Alkmaar
12. Medisch Centrum Leeuwarden
13. Medisch Spectrum Twente
14. Netherlands Cancer Institute
15. Radboudumc
16. Reinier de Graaf Groep
17. Rijnland ziekenhuis
18. Rijnstate ziekenhuis
19. Sint Lucas Andreas Ziekenhuis
20. Spaarne ziekenhuis
21. University Medical Center Groningen
22. University Medical Center Utrecht
23. VU Medical Center
24. ZGT Hengelo
